| SN | IN SCHOOL | NEVER ATTENDED | DROPPED OUT | COMMENTS                                            |
|----|-----------|----------------|-------------|-----------------------------------------------------|
| 1  | yes       |                |             | Received treatment once and did not come back       |
| 2  | yes       |                |             | Started treatment and dropped out                   |
| 3  | yes       |                |             | stable but defaulted in September,                  |
| 4  |           | yes            |             | He has been receiving treatment consistently        |
| 5  | yes       |                |             | Taking his drugs consistently                       |
| 6  | yes       |                |             | Taking drugs consistently and improving             |
| 7  |           | Yes            |             | Improving and adhering to treatment                 |
| 8  |           | Yes            |             | Has dropped out of treatment                        |
| 9  | yes       |                |             | Initiated on treatment but defaulted                |
| 10 |           |                |             | Stable on medication but transferred to Gulu        |
| 11 | yes       |                |             | Stable on medication                                |
| 12 |           | yes            |             | Started treatment and dropped out                   |
| 13 | yes       |                |             | Started treatment and dropped out                   |
| 14 | yes       |                |             | After review noted was epileptic                    |
| 15 |           |                | yes         | Not regular in accessing treatment                  |
| 16 |           |                | yes         | Stable on Medication                                |
| 17 |           | yes            |             | Transferred to kitgum in September                  |
| 18 |           |                | yes         | Improved greatly and adhering to treatment          |
| 19 | yes       |                |             | Stable and adhering to medication                   |
| 20 | yes       |                |             | Stable on medication                                |
| 21 | yes       |                |             | Stable on medication                                |
| 22 |           |                | yes         | Stable on medication with some improvement          |
| 23 |           |                | yes         | Stable on medication but defaulted                  |
| 24 |           |                | yes         | Stable on medication                                |
| 25 |           |                | yes         | Stable on medication                                |
| 26 | yes       |                |             | Stable and on medication                            |
| 27 | yes       |                |             | Stable and on medication                            |
| 28 |           |                | yes         | Stable and on medication                            |
| 29 | yes       |                |             | Stable and on medication                            |
| 30 | yes       |                |             | Defaulted in October                                |
| 31 |           |                | yes         | Stable and on medication                            |
| 32 | yes       |                |             | Not regular in accessing treatment                  |
| 33 |           |                | yes         | Defaulted                                           |
| 34 |           |                | yes         | Not regular in accessing treatment                  |
| 35 |           |                | yes         | On medication with little improvement               |
| 36 |           |                | yes         | Stable and on medication                            |
| 37 | yes       |                |             | Not regular in accessing treatment                  |
| 38 |           |                | yes         | On medication, experiencing frequent attacks lately |
| 39 | yes       |                |             | defaulted                                           |
| 40 | yes       |                |             | On medication                                       |
| 41 |           |                | Yes         | Lost to follow up                                   |
| 42 |           |                | yes         | Lost to follow up                                   |
| 43 |           |                | Yes         | Started treatment and defaulted in November         |
| 44 |           |                | yes         | Stable and on Medication                            |
| 45 |           | yes            |             | Started treatment and dropped out                   |

|    |     |     |                                                         |
|----|-----|-----|---------------------------------------------------------|
| 46 | yes |     | Started treatment and dropped out                       |
| 47 |     | yes | Stable on medication but defaulted                      |
| 48 |     | yes | Stable and on Medication                                |
| 49 |     | yes | Stable and on Medication                                |
| 50 |     | yes | Stable and on Medication                                |
| 51 | yes |     | ON medication but not regularly collecting drugs        |
| 52 | yes |     | Stable and on Medication                                |
| 52 | yes |     | Stable and on Medication                                |
| 54 | yes |     | Stable and on Medication                                |
| 55 | yes |     | Stable on medication                                    |
| 56 | yes |     | Stable and on Medication                                |
| 57 |     | yes | Stable and on Medication                                |
| 58 |     |     | Stable on treatment                                     |
| 59 |     | yes | Stable and on Medication but defaulted in November      |
| 60 |     | yes | Stable and on Medication                                |
| 61 |     | yes | Stable on medication                                    |
| 62 |     | yes | Stable and on medication                                |
| 63 |     | yes | Stable and on medication                                |
| 64 |     | yes | Stable and on medication                                |
| 65 | yes |     | Started treatment defaulted in August                   |
| 66 | yes |     | Adhering to medication and improving                    |
| 67 | yes |     | Not regular in accessing treatment                      |
| 68 |     | yes | Adhering to medication and improving                    |
| 69 |     | yes | Stable and on medication                                |
| 70 | yes |     | Adhering to medication and improving                    |
| 71 |     | yes | Adhering to medication with slight improvement          |
| 72 | yes |     | Adhering to treatment and improving                     |
| 73 |     | yes | Adhering to medication with slight improvement          |
| 74 |     | yes | Stable and adhering to medication                       |
| 75 | yes |     | Adhering to medication with slight improvement          |
| 76 | yes |     | Adhering to medication and improving                    |
| 77 |     | yes | Adhering to treatment with attacks only when it is cold |
| 78 |     | yes | Adhering to treatment with slight improvement           |
| 79 |     | yes | Adhering with no improvement                            |
| 80 |     | yes | Adhering to medication with improvement                 |
| 81 |     | yes | Adhering to medication and improving                    |
| 82 |     | yes | Adhering to medication with improvement                 |
| 83 |     | yes | Adhering to medication with slight improvement          |
| 84 | yes |     | Adhering to medication with improvement                 |
| 85 |     | yes | Adhering to medication with improvement                 |
| 86 | yes |     | Adhering to medication with little improvement          |
| 87 |     | yes | Adhering to medication with slight improvement          |
| 88 |     | yes | Adhering to medication with improvement                 |
| 89 |     | yes | Adhering to medication with improvement                 |
| 90 | yes |     | Adhering to medication with improvement                 |
| 91 |     | yes | Adhering to medication with improvement                 |
| 92 |     | yes | Adhering to medication with slight improvement          |

|     |     |     |                                                  |
|-----|-----|-----|--------------------------------------------------|
| 93  | yes |     | Adhering to medication with slight improvement   |
| 94  |     | yes | Adhering to medication with improvement          |
| 95  | yes |     | Adhering to medication with improvement          |
| 96  | yes |     | Adhering to medication with slight improvement   |
| 97  |     | yes | Adhering to medication and is stable             |
| 98  | yes |     | Adhering to medication with improvement          |
| 99  | yes |     | Adhering to medication with improvement          |
| 100 | no  | yes | Received treatment once and did not come back    |
| 101 | yes | no  | Improving and adhering to treatment              |
| 102 | yes |     | He has been receiving treatment consistently     |
| 103 | yes |     | Taking his drugs consistently                    |
| 104 | yes |     | Taking drugs consistently and improving          |
| 105 | no  |     | Improving and adhering to treatment              |
| 106 | no  | yes | Adhering to medication and resume school         |
| 107 | no  | yes | Improving and adhering to treatment              |
| 108 | yes |     | Improved and adhering to treatment               |
| 109 | yes |     | Improved and adhering to treatment               |
| 110 | no  | yes | Improved greatly and adhering to treatment       |
| 111 |     | yes | Stable and adhering to medication                |
| 112 |     | yes | Stable on medication                             |
| 113 |     | yes | Stable on medication                             |
| 114 |     | yes | Improved but deteriorate                         |
| 115 |     | yes | Improved and adhering to treatment               |
| 116 | yes |     | Improved and adhering to treatment               |
| 117 |     | yes | Some Improvement                                 |
| 118 |     | yes | Improved and adhering to treatment               |
| 119 |     | yes | Improved and adhering to treatment               |
| 120 |     | yes | Improved and adhering to treatment               |
| 121 |     | yes | Improved and adhering to treatment               |
| 122 |     | yes | Marked Improvement and adhering to treatment     |
| 123 |     | yes | Marked Improvement and adhering to treatment     |
| 124 |     | yes | Marked Improvement and adhering to treatment     |
| 125 |     | yes | Some improvement                                 |
| 126 |     | yes | Marked Improvement and adhering to treatment     |
| 127 | yes |     | Marked Improvement and adhering to treatment     |
| 128 | yes |     | Marked Improvement and adhering to treatment     |
| 129 |     | yes | Marked Improvement and adhering to treatment     |
| 130 |     | yes | Improvement and adhering to treatment            |
| 131 | yes |     | Improvement and adhering to treatment            |
| 132 | yes |     | Improvement and adhering to treatment            |
| 133 |     | yes | Adhering to medication with no improvement       |
| 134 |     | yes | Adhering to medication with improvement          |
| 135 |     | yes | Adhering to medication with improvement          |
| 136 | yes |     | Adhering to medication with improvement          |
| 137 | yes |     | Adhering to medication with improvement          |
| 138 | yes |     | Adhering to medication with improvement          |
| 139 | yes |     | was stable on medication but defaulted in August |

|     |     |     |                                                |
|-----|-----|-----|------------------------------------------------|
| 140 |     | yes | Adhering to medication with improvement        |
| 141 | yes |     | Adhering to medication with slight improvement |
| 142 | yes |     | Adhering to medication with improvement        |
| 143 | yes |     | Adhering to medication with improvement        |
| 144 |     | yes | Adhering to medication with improvement        |
| 145 |     | yes | Adhering to medication with improvement        |
| 146 | yes |     | Adhering to medication with little improvement |
| 147 | yes |     | Adhering to medication with improvement        |
| 148 |     | yes | Adhering to medication with improvement        |
| 149 | yes |     | Adhering to medication with improvement        |
| 150 |     | yes | Adhering to medication with improvement        |
| 151 | yes |     | Adhering to medication with improvement        |
| 152 | yes |     | Adhering to medication with improvement        |
| 153 |     | yes | Adhering to medication with improvement        |
| 154 |     | yes | Adhering to medication with slight improvement |
| 155 | yes |     | Adhering to medication with improvement        |
| 156 |     | yes | not regular in collecting her drugs            |
| 157 |     | yes | Adhering to medication with improvement        |
| 158 |     | yes | Adhering to medication with improvement        |
| 159 |     | yes | Adhering to medication with improvement        |
| 160 | yes |     | Adhering to medication with improvement        |
| 161 | yes |     | Adhering to medication with improvement        |
| 162 |     | yes | Adhering to medication with improvement        |
| 163 |     | yes | Adhering to medication with improvement        |
| 164 |     | yes | Adhering to medication with improvement        |
| 165 |     | yes | Adhering to medication with much improvement   |
| 166 |     | yes | Adhering to medication with slight improvement |
| 167 | yes |     | Adhering to medication with slight improvement |
| 168 |     | yes | Adhering to medication with slight improvement |
| 169 | yes |     | Adhering to medication with improvement        |
| 170 | yes |     | Adhering to medication with improvement        |
| 171 |     | yes | Adhering to medication with slight improvement |
| 172 |     | yes | Adhering to medication with improvement        |
| 173 | yes |     | Adhering to medication with improvement        |
| 174 | yes |     | Adhering to medication with improvement        |
| 175 | yes |     | Adhering to medication with improvement        |
| 176 |     | yes | Adhering to medication with much improvement   |
| 177 | yes |     | Adhering to medication with much improvement   |
| 178 |     | yes | Adhering to medication with improvement        |
| 179 | yes |     | Adhering to medication with improvement        |
| 180 |     | yes | not regular in collecting her drugs            |
| 181 | yes |     | Adhering to medication with improvement        |
| 182 |     | yes | Adhering to medication with slight improvement |
| 183 | yes |     | Adhering to medication with improvement        |
| 184 |     | yes | Adhering to medication with improvement        |
| 185 | yes |     | Adhering to medication with improvement        |
| 186 | yes |     | Adhering to medication with improvement        |

|     |                |     |                                                      |
|-----|----------------|-----|------------------------------------------------------|
| 187 |                | yes | Adhering to medication with improvement              |
| 188 |                | yes | Adhering to medication with improvement              |
| 189 |                | yes | Defaulted but is back with many episodes od seizures |
| 190 | yes            |     | Adhering to medication with improvement              |
| 191 | yes            |     | Adhering to medication with improvement              |
| 192 | yes            |     | Adhering to medication with improvement              |
| 197 | yes            |     | Adhering to medication with slight improvement       |
| 194 |                | Yes | adhering to treatment with no improvement            |
| 195 |                | yes | Adhering to medication with slight improvement       |
| 196 | yes            |     | Adhering to medication with slight improvement       |
| 197 |                | yes | Adhering to medication with slight improvement       |
| 198 |                | yes | Adhering to medication with improvement              |
| 199 | yes            |     | Adhering to medication with improvement              |
| 200 |                | yes | Adhering to medication with marked improvement       |
| 201 |                | yes | Adhering to medication with improvement              |
| 202 |                | yes | Adhering to medication with marked improvement       |
| 203 |                | yes | Adhering to medication with slight improvement       |
| 204 |                | yes | Adhering to medication with slight improvement       |
| 205 | yes            |     | Stable on medication and dropped out in Oct          |
| 206 | yes            |     | Defaulted                                            |
| 207 |                | yes | Stable on medication but defaulted in December       |
| 208 |                | yes | Stable on medication but defaulted in December       |
| 209 |                | yes | Reviews indicated the patient had epilepsy           |
| 210 | yes            |     | Adhering to medication with improvement              |
| 211 | yes            |     | Adhering to medication with improvement              |
| 212 | yes            |     | Stable on Medication with slight improvement         |
| 213 | yes            |     | Adhering to medication with slight improvement       |
| 214 | yes            |     | Adhering to medication with slight improvement       |
| 215 | Resumed School |     | Adhering to medication with slight improvement       |
| 216 | yes            |     | Adhering to medication with improvement              |
| 217 |                | yes | Adhering to medication with slight improvement       |
| 218 | yes            |     | Adhering to medication with litt;e improvement       |
| 219 |                | yes | Adhering to medication with improvement              |
| 220 |                | yes | Adhering to medication with improvement              |
| 221 | yes            |     | Adhering to medication with marked improvement       |
| 222 |                | yes | Adhering to medication with marked improvement       |
| 223 |                | yes | Adhering to medication with improvement              |
| 224 |                | yes | Improvement and adhering to treatment                |
| 225 |                | yes | Marked Improvement and adhering to treatment         |
| 226 |                | Yes | Some Improvement                                     |
| 227 |                | yes | Marked Improvement and adhering to treatment         |
| 228 |                | yes | Some Improvement                                     |
| 229 |                | yes | Improvement and adhering to treatment                |
| 230 | Yes            |     | Marked Improvement and adhering to treatment         |
| 231 | Yes            |     | Some Improvement                                     |
| 232 |                | yes | Some Improvement                                     |
| 233 | Yes            |     | Improvement and adhering to treatment                |

|     |     |     |                                                              |
|-----|-----|-----|--------------------------------------------------------------|
| 234 |     | yes | Some Improvement                                             |
| 235 |     | yes | Marked Improvement and adhering to treatment                 |
| 236 | Yes |     | Marked Improvement and adhering to treatment                 |
| 237 |     | yes | Marked Improvement and adhering to treatment                 |
| 238 | Yes |     | Marked Improvement and adhering to treatment                 |
| 239 | Yes |     | Some Improvement                                             |
| 240 |     | yes | Improvement and adhering to treatment                        |
| 241 |     | yes | Some Improvement                                             |
| 242 |     | yes | Adhering to medication with slight improvement               |
| 243 |     | yes | Adhering to medication with marked improvement               |
| 244 |     | yes | Adhering to medication with slight improvement               |
| 245 |     |     | Adhering to medication with improvement                      |
| 246 |     | yes | Adhering to medication with improvement                      |
| 247 |     | yes | Adhering to medication with improvement                      |
| 248 | yes |     | Adhering to medication with slight improvement               |
| 249 |     | yes | Adhering to medication with marked improvement               |
| 250 | yes |     | Adhering to medication with improvement                      |
| 251 |     | yes | Little Improvement while adhering to medication              |
| 252 |     | yes | Improvedment and adhering to medication                      |
| 253 | yes |     | Improvedment and adhering to medication                      |
| 254 |     | yes | Improvedment and adhering to medication                      |
| 255 | yes |     | Adhering to medication with improvement                      |
| 256 |     | yes | Adhering to medication with improvement                      |
| 257 |     | yes | Adhering to medication with improvement                      |
| 258 | yes |     | Stable on medication but defaulted                           |
| 259 |     | yes | Accessing treatment but some times skips treatment           |
| 260 |     | yes | Accessing treatment but some times skips treatment           |
| 261 |     | yes | Adhering to medication with marked improvement               |
| 262 |     | yes | Adhering to medication with slight improvement               |
| 263 |     | yes | Adhering to medication with improvement                      |
| 264 | yes |     | Adhering to medication with no improvement                   |
| 265 | yes |     | Lost to follow up                                            |
| 266 |     | yes | Accessed treatment for four month and dropped out in October |
| 267 | yes |     | defaulted in August                                          |
| 268 |     | yes | After further review discovered was epileptic                |
| 269 |     | yes | Adhering to medication with slight improvement               |
| 270 |     | yes | Adhering to medication with improvement                      |
| 271 | yes |     | Adhering to medication with slight improvement               |
| 272 |     | yes | Adhering to medication with slight improvement               |
| 273 |     | yes | Adhering to medication with improvement                      |
| 274 | yes |     | Defaulted                                                    |
| 275 | yes |     | Adhering to medication with improvement                      |
| 276 | yes |     | Defaulted                                                    |
| 277 |     | yes | defaulted                                                    |
| 278 |     | yes | Adhering to medication with slight improvement               |
| 279 |     | yes | Adhering to medication with improvement                      |
| 280 | yes |     | Adhering to medication with improvement                      |

|     |     |     |                                                                     |
|-----|-----|-----|---------------------------------------------------------------------|
| 281 |     | yes | Adhering to medication with improvement                             |
| 282 |     | yes | Adhering to medication with improvement                             |
| 283 |     | yes | Adhering to medication with improvement                             |
| 284 |     | yes | Adhering to medication with improvement                             |
| 286 | yes |     | Adhering to medication with improvement                             |
| 287 | yes |     | Adhering to medication with improvement                             |
| 288 |     | yes | Adhering to medication with improvement                             |
| 289 | yes |     | Adhering to medication with improvement                             |
| 290 | yes |     | Adhering to medication with improvement                             |
| 291 | yes |     | Adhering to medication with improvement                             |
| 292 |     | Yes | Marked Improvement                                                  |
| 293 | yes |     | Marked Improvement                                                  |
| 294 |     | yes | Adhering to medication with marked improvement                      |
| 295 | yes |     | Adhering to medication with marked improvement                      |
| 295 | yes |     | Adhering to medication with marked improvement but defaulted in     |
| 296 | yes |     | Adhering to medication with marked improvement but defaulted in     |
| 297 |     | yes | Reported for treatment and dropped out after three visits           |
| 298 |     | yes | Reported to the clinic and dropped out after 2 treatment sessions   |
| 299 | yes |     | Adhering to medication with marked improvement but defaulted in     |
| 300 |     | yes | Accessed treatment with marked improvement but dropped out in       |
| 301 | yes |     | Not regularly getting drugs                                         |
| 302 | yes |     | Reported as a nodding case after further screening noted as epileps |
| 303 | yes |     | Not regularly getting drugs                                         |
| 304 | yes |     | Defaulted                                                           |
| 305 | yes |     | Adhering to medication with improvement                             |
| 306 | yes |     | Not regularly accessing treatment but stable with medication        |
| 307 |     | yes | Adhering to medication with marked improvement                      |













| December  
| December

| December  
December

·y
