# Supplementary material for: Modelling optimal allocation of resources in the context of an incurable disease
Source: PLOS journal article supplement (doi:10.1371/journal.pone.0172401), 2017-03-13
Supplement: S1 (10.1371/journal.pone.0172401.s001) [file journal.pone.0172401.s001]

Flow diagram for the dynamics of nodding syndrome
