# Supplementary material for: Modelling optimal allocation of resources in the context of an incurable disease
Source: PLOS journal article supplement (doi:10.1371/journal.pone.0172401), 2017-03-13
Supplement: S6 (10.1371/journal.pone.0172401.s006) [file journal.pone.0172401.s006]

**PROGRAM FOR NODDING SYNDROME OUTREACH SERVICES FOR THE MONTH OF JULY 2012**

| Date | Activity Package       | Requirements       |
|------|------------------------|--------------------|
|      | Screening              | Weighing scales    |
|      | Treatment & Referrals  | Muac tapes         |
|      | Lab tests, Skin sniffs | Height boards      |
|      | Nutrition Assessment   | Plumpy Nuts        |
|      | Supplimentary feeds    | ATMIT              |
|      | Psychosocial Support   | Lab reagents       |
|      | Health Education       | Sodium Valproate   |
|      | Follow up Rx Outcome   | Vitamin A          |
|      | Surveillance           | Vitamin B6         |
|      |                        | Vitamin B12        |
|      |                        | Folic Acid         |
|      |                        | Case forms         |
|      |                        | Follow up forms    |
|      |                        | N/S OPD register   |
|      |                        | N/S Line-lists     |
|      |                        |                    |
|      |                        |                    |
|      |                        |                    |
|      |                        | <b>Mobilisers:</b> |
|      |                        | LCIII              |
|      |                        | Gisu               |
|      |                        | i/c Health Units   |
|      |                        | HA/HI              |
|      |                        | LCI                |
|      |                        | Schools            |
|      |                        | VHTs               |
|      |                        |                    |
|      |                        | <b>Time:</b>       |
|      |                        | Starting: 10:00am  |
|      |                        | Ending : 04:00pm   |

|  |  |  |
|--|--|--|
|  |  |  |
|--|--|--|
